# Supplementary material
Source: Springer Nature journal article supplement (https://www.springermedizin.de/resource/supplementary/12885_2011_3006_MOESM2_ESM.pdf/9463488)

**A**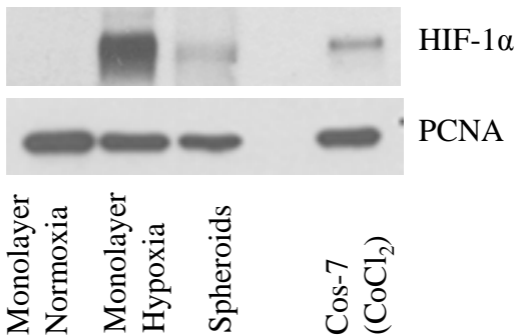**B**

H<sub>2</sub>O  
 Monolayer Normoxia  
 Spheroids  
 Monolayer Hypoxia

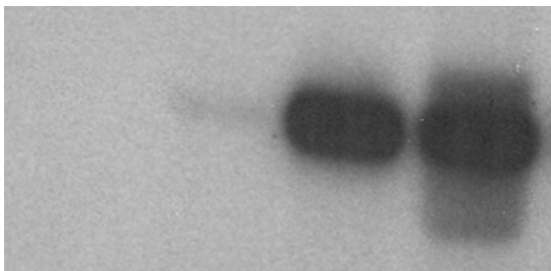**C**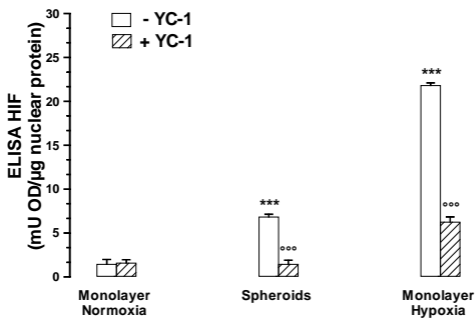

Supplement: MOESM2 [file 9463488]
